# Supplementary material for: Complete Mitochondrial Genome of Malenka flexura (Plecoptera: Nemouridae) and Phylogenetic Analysis
Source: MDPI journal article supplement (doi:10.3390/genes13050911), 2022-05-19
Supplement: s1 [file s1]

## Supplementary Materials

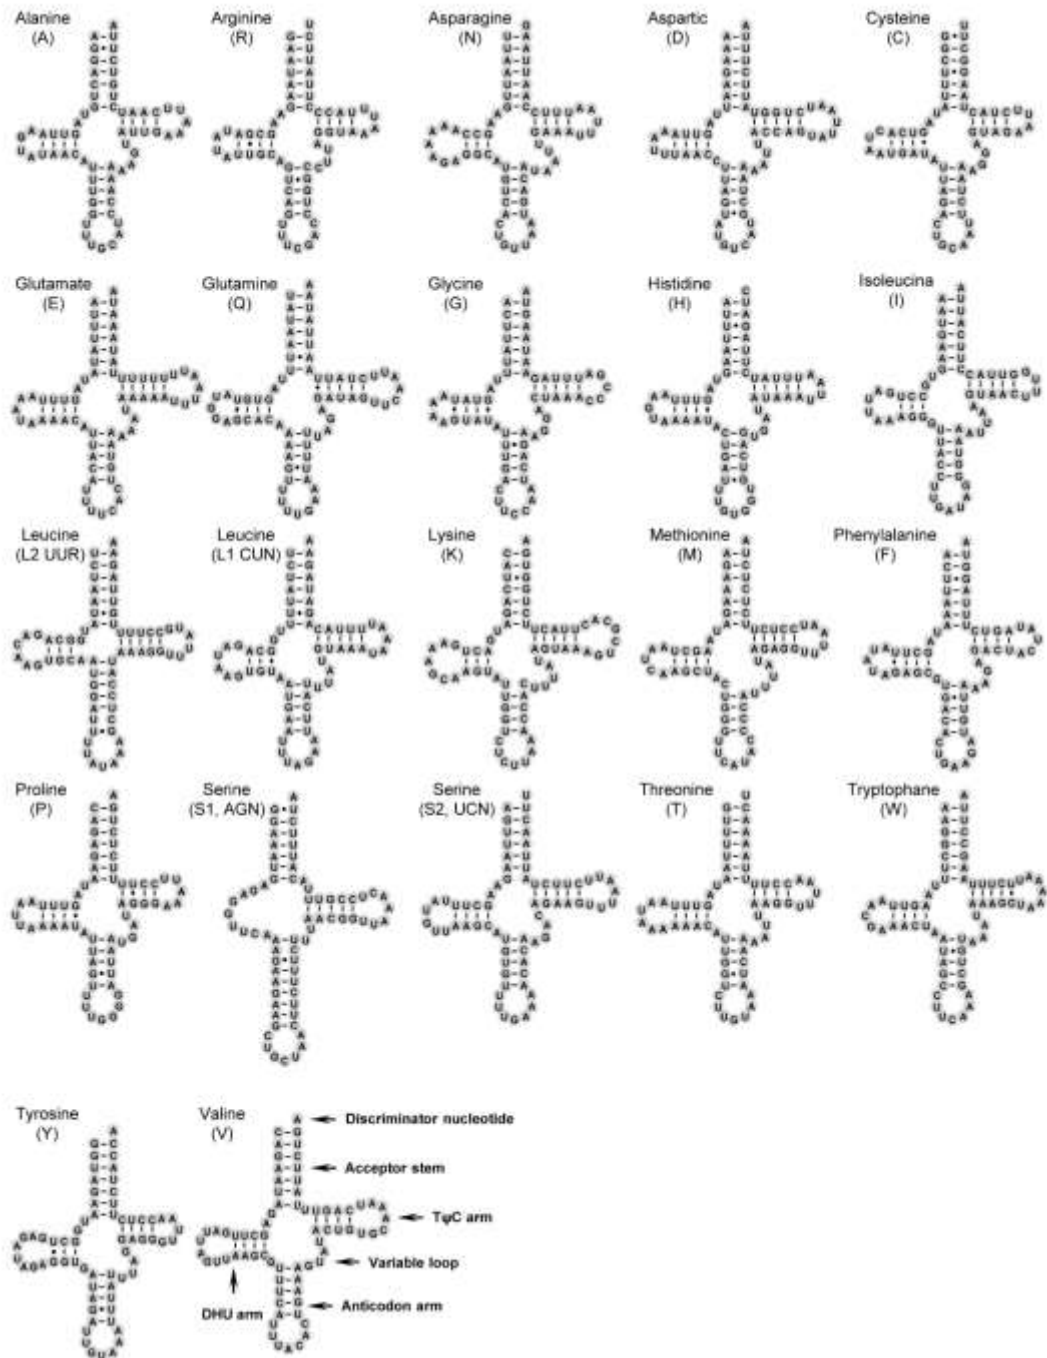

**Figure S1.** Predicted secondary structure of 22 tRNAs in *M. flexura* mitogenome.

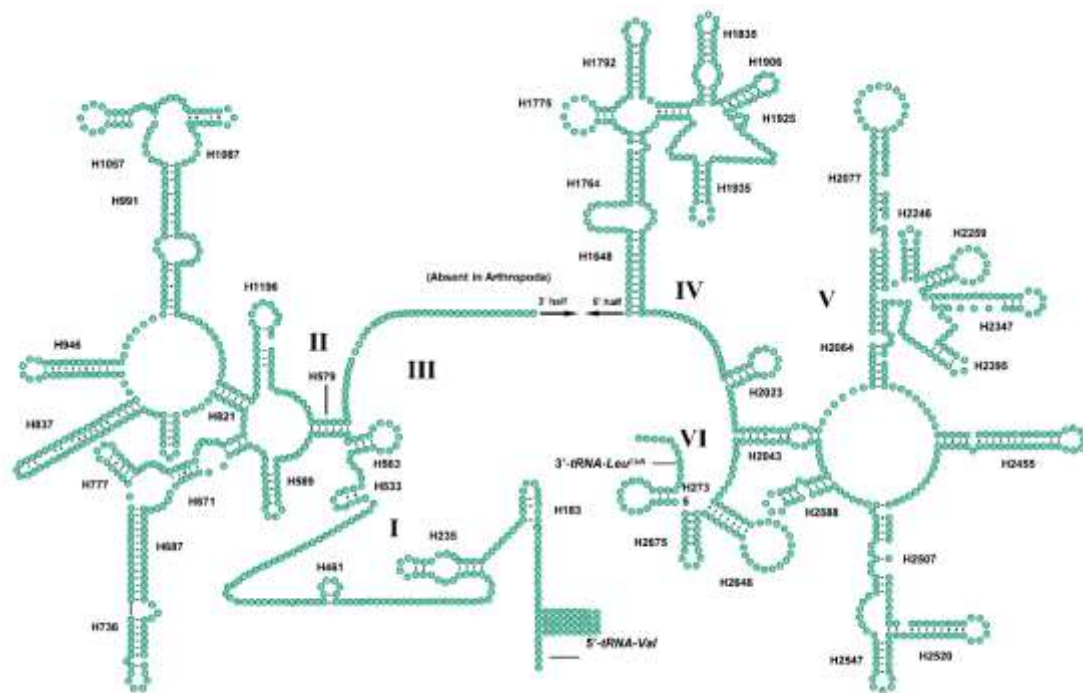

**Figure S2.** Predicted secondary structure of the *lrRNA* gene in *M. flexura* mitogenome.
